# Supplementary material for: The Implementation of Internet Interventions for Depression: A Scoping Review
Source: PubMed Central journal article supplement (PMC5034149; doi:10.2196/jmir.5670), 2016-09-08
Supplement: jmir_v18i9e236_app2.pdf [file jmir_v18i9e236_app2.pdf]

## MULTIMEDIA APPENDIX 2: COMPLETE LIST OF HAND-SEARCHED JOURNALS

| No. | Journal                                          |
|-----|--------------------------------------------------|
| 1   | Addiction                                        |
| 2   | Administration and Policy in Mental Health       |
| 3   | American Journal of Community Psychology         |
| 4   | American Journal of Preventive Medicine          |
| 5   | Annals of Behavioral Medicine                    |
| 6   | Australian and New Zealand Journal of Psychiatry |
| 7   | Behaviour Research and Therapy                   |
| 8   | Behavioural and Cognitive Psychotherapy          |
| 9   | BioMed Central                                   |
| 10  | BMC Psychiatry                                   |
| 11  | British Journal of Psychiatry                    |
| 12  | Cognitive Behaviour Therapy                      |
| 13  | Computers in Human Behavior                      |
| 14  | Dissertation Abstracts International: Section B  |
| 15  | European Psychiatry                              |
| 16  | Health Education Research                        |
| 17  | Implementation Science                           |
| 18  | Interactive Journal of Medical Internet Research |
| 19  | Iproceedings                                     |
| 20  | JMIR Cancer                                      |
| 21  | JMIR Challenges                                  |
| 22  | JMIR Diabetes                                    |
| 23  | JMIR Human Factors                               |
| 24  | JMIR Medical Education                           |
| 25  | JMIR Medical Informatics                         |
| 26  | JMIR Mental Health                               |
| 27  | JMIR mHealth and uHealth                         |
| 28  | JMIR Preprints                                   |
| 29  | JMIR Public Health and Surveillance              |
| 30  | JMIR Rehabilitation and Assistive Technologies   |
| 31  | JMIR Research Protocols                          |
| 32  | JMIR Serious Games                               |
| 33  | Journal of Affective Disorders                   |
| 34  | Journal of Applied Psychology                    |
| 35  | Journal of Clinical Psychology                   |
| 36  | Journal of Consulting and Clinical Psychology    |
| 37  | Journal of Medical Internet Research             |
| 38  | Medical Journal of Australia                     |
| 39  | Medicine 2.0                                     |
| 40  | PLoS ONE                                         |
| 41  | Preventive Medicine                              |
| 42  | Psychiatrische Praxis                            |
| 43  | Psychological Medicine                           |
| 44  | The Journal of Positive Psychology               |
| 45  | The Journal of Primary Prevention                |
| 46  | The Sciences and Engineering                     |
