# Supplementary material for: The Implementation of Internet Interventions for Depression: A Scoping Review
Source: PubMed Central journal article supplement (PMC5034149; doi:10.2196/jmir.5670), 2016-09-08
Supplement: jmir_v18i9e236_app3.pdf [file jmir_v18i9e236_app3.pdf]

### MULTIMEDIA APPENDIX 3: LIST OF INCLUDED REFERENCES FOR ANALYSIS

| ID | First author   | Publication year | Title                                                                                                                                     | Journal                                                                        |
|----|----------------|------------------|-------------------------------------------------------------------------------------------------------------------------------------------|--------------------------------------------------------------------------------|
| 1  | Allen, M       | 2008             | Improving patient-clinician communication about chronic conditions - Description of an Internet-based nurse e-coach intervention          | Nursing Research                                                               |
| 2  | Almlov, J      | 2009             | Therapist factors in Internet-delivered cognitive behavioural therapy for major depressive disorder                                       | Cognitive Behaviour Therapy                                                    |
| 3  | Bae, J         | 2009             | Development of a user-centered health information service system for depressive symptom management                                        | Nursing & Health Sciences                                                      |
| 4  | Barazzone, N   | 2012             | Computerized cognitive behavioural therapy and the therapeutic alliance: A qualitative enquiry                                            | British Journal of Clinical Psychology                                         |
| 5  | Barrera, A Z   | 2014             | Keywords to recruit Spanish- and English-speaking participants: evidence from an online postpartum depression randomized controlled trial | Journal of Medical Internet Research                                           |
| 6  | Batterham, P J | 2008             | Predictors of adherence among community users of a cognitive behavior therapy website                                                     | Patient Preference & Adherence                                                 |
| 7  | Beattie, A     | 2009             | Primary-care patients' expectations and experiences of online cognitive behavioural therapy for depression: a qualitative study           | Health Expectations                                                            |
| 8  | Bendelin, N    | 2011             | Experiences of guided Internet-based cognitive-behavioural treatment for depression: a qualitative study                                  | BMC Psychiatry                                                                 |
| 9  | Boggs, J. M.   | 2014             | Web-based intervention in mindfulness meditation for reducing residual depressive symptoms and relapse prophylaxis: a qualitative study.  | Journal of Medical Internet Research                                           |
| 10 | Bolier, L      | 2013             | An internet-based intervention to promote mental fitness for mildly depressed adults: randomized controlled trial                         | Journal of Medical Internet Research                                           |
| 11 | Bowie, C R     | 2013             | Cognitive remediation for treatment-resistant depression: effects on cognition and functioning and the role of online homework            | Journal of Nervous and Mental Disease                                          |
| 12 | Button, K S    | 2012             | Factors associated with differential response to online cognitive behavioural therapy                                                     | Social Psychiatry and Psychiatric Epidemiology                                 |
| 13 | Callear, A L   | 2009             | The YouthMood Project: a cluster randomized controlled trial of an online cognitive behavioral program with adolescents                   | Journal of Consulting and Clinical Psychology                                  |
| 14 | Callear, A L   | 2013             | Adherence to the MoodGYM program: outcomes and predictors for an adolescent school-based population                                       | Journal of Affective Disorders                                                 |
| 15 | Carper, M M    | 2013             | The Dissemination of Computer-Based Psychological Treatment: A Preliminary Analysis of Patient and Clinician Perceptions                  | Administration and Policy in Mental Health and Mental Health Services Research |
| 16 | Christensen, H | 2002             | Web-based cognitive behavior therapy: analysis of site usage and changes in depression and anxiety scores                                 | Journal of Medical Internet Research                                           |

|    |                |      |                                                                                                                                                |                                                         |
|----|----------------|------|------------------------------------------------------------------------------------------------------------------------------------------------|---------------------------------------------------------|
| 17 | Christensen, H | 2004 | A comparison of changes in anxiety and depression symptoms of spontaneous users and trial participants of a cognitive behavior therapy website | BMJ: British Medical Journal (International Edition)    |
| 18 | Christensen, H | 2004 | Delivering interventions for depression by using the Internet: randomised controlled trial                                                     | Journal of Medical Internet Research                    |
| 19 | Christensen, H | 2006 | Free range users and one hit wonders: community users of an Internet-based cognitive behaviour therapy program                                 | Australian and New Zealand Journal of Psychiatry        |
| 20 | Christensen, H | 2006 | Online randomized controlled trial of brief and full cognitive behaviour therapy for depression                                                | Psychological Medicine                                  |
| 21 | Christensen, H | 2007 | Reaching standards for dissemination: a case study                                                                                             | Studies in Health Technology and Informatics            |
| 22 | Clarke, G      | 2002 | Overcoming depression on the Internet (ODIN): a randomized controlled trial of an Internet depression skills intervention program              | Journal of Medical Internet Research                    |
| 23 | Clarke, G      | 2005 | Overcoming Depression on the Internet (ODIN) (2): a randomized trial of a self-help depression skills program with reminders                   | Journal of Medical Internet Research                    |
| 24 | Clarke, G      | 2009 | Randomized effectiveness trial of an Internet, pure self-help, cognitive behavioral intervention for depressive symptoms in young adults       | Cognitive Behaviour Therapy                             |
| 25 | Cook, J E      | 2002 | Working alliance in online therapy as compared to face-to-face therapy: Preliminary results                                                    | CyberPsychology & Behavior                              |
| 26 | Crisp, D       | 2014 | An online intervention for reducing depressive symptoms: Secondary benefits for self-esteem, empowerment and quality of life                   | Psychiatry Research Feb                                 |
| 27 | Currie, S L    | 2010 | Development and usability of an online CBT program for symptoms of moderate depression, anxiety, and stress in post-secondary students         | Computers in Human Behavior                             |
| 28 | Danaher, B G   | 2012 | Web-Based Intervention for Postpartum Depression: Formative Research and Design of the MomMoodBooster Program                                  | JMIR Research Protocols                                 |
| 29 | Danaher, B G   | 2013 | MomMoodBooster web-based intervention for postpartum depression: feasibility trial results                                                     | Journal of Medical Internet Research                    |
| 30 | De Graaf, L E  | 2009 | Clinical effectiveness on online computerised cognitive-behavioural therapy without support for depression in primary care: Randomised trial   | The British Journal of Psychiatry                       |
| 31 | de Graaf, L E  | 2009 | Use and acceptability of unsupported online computerized cognitive behavioral therapy for depression and associations with clinical outcome    | Journal of Affective Disorders                          |
| 32 | de Graaf, L    | 2010 | Predicting outcome in computerized cognitive behavioral therapy for depression in primary care: A randomized trial                             | Journal of Consulting and Clinical Psychology           |
| 33 | de Graaf, L E  | 2011 | One-year follow-up results of unsupported online computerized cognitive behavioural therapy for depression in primary care: A randomized trial | Journal of Behavior Therapy and Experimental Psychiatry |

|    |                        |      |                                                                                                                                                                                                                  |                                                              |
|----|------------------------|------|------------------------------------------------------------------------------------------------------------------------------------------------------------------------------------------------------------------|--------------------------------------------------------------|
| 34 | Department of Health   | 2007 | Improving Access to Psychological Therapies (IAPT) Programme: Computerized Cognitive Behavioural Therapy (cCBT) implementation guidance                                                                          | Department of Health                                         |
| 35 | Donker, T              | 2013 | Internet-delivered interpersonal psychotherapy versus internet-delivered cognitive behavioral therapy for adults with depressive symptoms: randomized controlled noninferiority trial                            | Journal of Medical Internet Research                         |
| 36 | Donker, T              | 2013 | Predictors and moderators of response to internet-delivered Interpersonal Psychotherapy and Cognitive Behavior Therapy for depression                                                                            | Journal of Affective Disorders                               |
| 37 | Ebert, D D             | 2013 | For Whom Does It Work? Moderators of Outcome on the Effect of a Transdiagnostic Internet-Based Maintenance Treatment After Inpatient Psychotherapy: Randomized Controlled Trial                                  | Journal of Medical Internet Research                         |
| 38 | Eisen, J C             | 2013 | Pilot study of implementation of an internet-based depression prevention intervention (CATCH-IT) for adolescents in 12 US primary care practices: Clinical and management/organizational behavioral perspectives | Primary Care Companion to the Journal of Clinical Psychiatry |
| 39 | Farrer, L              | 2011 | Internet-based CBT for depression with and without telephone tracking in a national helpline: randomised controlled trial                                                                                        | PLoS ONE                                                     |
| 40 | Farrer, L              | 2012 | Web-based cognitive behavior therapy for depression with and without telephone tracking in a national helpline: secondary outcomes from a randomized controlled trial                                            | Journal of Medical Internet Research                         |
| 41 | Farrer, L M            | 2013 | Predictors of adherence and outcome in internet-based cognitive behavior therapy delivered in a telephone counseling setting                                                                                     | Cognitive Therapy and Research                               |
| 42 | Gerhards, S A          | 2011 | Improving adherence and effectiveness of computerised cognitive behavioural therapy without support for depression: a qualitative study on patient experiences                                                   | Journal of Affective Disorders                               |
| 43 | Gerhards, S A H        | 2011 | Economic evaluation of online computerized cognitive behavioural therapy without support for depression in primary care: A randomized trial                                                                      | Journal of Mental Health Policy and Economics                |
| 44 | Gerrits, R S           | 2007 | Master your mood online: A preventive chat group intervention for adolescents                                                                                                                                    | Australian e-Journal for the Advancement of Mental Health    |
| 45 | Gladstone, T           | 2014 | Understanding adolescent response to a technology-based depression prevention program                                                                                                                            | Journal of Clinical Child and Adolescent Psychology          |
| 46 | Gun, S Y               | 2011 | Acceptability of Internet treatment of anxiety and depression                                                                                                                                                    | Australasian Psychiatry                                      |
| 47 | Hadjistavropoulos, H D | 2012 | Dissemination of therapist-assisted internet cognitive behaviour therapy: development and open pilot study of a workshop                                                                                         | Cognitive Behaviour Therapy                                  |

|    |                  |      |                                                                                                                                                                                                                                     |                                                                         |
|----|------------------|------|-------------------------------------------------------------------------------------------------------------------------------------------------------------------------------------------------------------------------------------|-------------------------------------------------------------------------|
| 48 | Haga, S M        | 2013 | Mamma mia: a feasibility study of a web-based intervention to reduce the risk of postpartum depression and enhance subjective well-being                                                                                            | JMIR Research Protocols                                                 |
| 49 | Hedman, E        | 2014 | Effectiveness of Internet-based cognitive behaviour therapy for depression in routine psychiatric care                                                                                                                              | Journal of Affective Disorders                                          |
| 50 | Hickie, I B      | 2010 | Practitioner-supported delivery of internet-based cognitive behaviour therapy: evaluation of the feasibility of conducting a cluster randomised trial                                                                               | Medical Journal of Australia                                            |
| 51 | Hilvert-Bruce, Z | 2012 | Adherence as a determinant of effectiveness of internet cognitive behavioural therapy for anxiety and depressive disorders                                                                                                          | Behaviour Research and Therapy                                          |
| 52 | Hoek, W          | 2011 | Randomized controlled trial of primary care physician motivational interviewing versus brief advice to engage adolescents with an Internet-based depression prevention intervention: 6-month outcomes and predictors of improvement | Translational Research: The Journal of Laboratory and Clinical Medicine |
| 53 | Hoek, W          | 2012 | Effects of Internet-based guided self-help problem-solving therapy for adolescents with depression and anxiety: a randomized controlled trial                                                                                       | PLoS ONE                                                                |
| 54 | Hoifodt, R S     | 2013 | The clinical effectiveness of web-based cognitive behavioral therapy with face-to-face therapist support for depressed primary care patients: randomized controlled trial                                                           | Journal of Medical Internet Research                                    |
| 55 | Hollinghurst, S  | 2010 | Cost-effectiveness of therapist-delivered online cognitive-behavioural therapy for depression: randomised controlled trial                                                                                                          | British Journal of Psychiatry                                           |
| 56 | Hunkeler, E M    | 2012 | A web-delivered care management and patient self-management program for recurrent depression: a randomized trial                                                                                                                    | Psychiatric Services                                                    |
| 57 | Iloabachie, C    | 2011 | Adolescent and parent experiences with a primary care/Internet-based depression prevention intervention (CATCH-IT)                                                                                                                  | General Hospital Psychiatry                                             |
| 58 | Jacmon, John     | 2009 | Treatment of major depression: Effectiveness of cognitive-behavioural therapy with an internet course as a central component                                                                                                        | E-Journal of Applied Psychology                                         |
| 59 | Johansson, R     | 2013 | Choosing between Internet-based psychodynamic versus cognitive behavioral therapy for depression: a pilot preference study                                                                                                          | BMC Psychiatry                                                          |
| 60 | Jones, R B       | 2012 | Accuracy of geographically targeted internet advertisements on Google AdWords for recruitment in a randomized trial                                                                                                                 | Journal of Medical Internet Research                                    |
| 61 | Jones, R B       | 2013 | Recruitment to online therapies for depression: pilot cluster randomized controlled trial                                                                                                                                           | Journal of Medical Internet Research                                    |
| 62 | Kelders, S M     | 2013 | Development of a web-based intervention for the indicated prevention of depression                                                                                                                                                  | BMC Medical Informatics and Decision Making                             |
| 63 | Kelders, S M     | 2013 | Participants, usage, and use patterns of a web-based intervention for the prevention of                                                                                                                                             | Journal of Medical Internet Research                                    |

|    |                |      |                                                                                                                                                                                                                                             |                                                  |
|----|----------------|------|---------------------------------------------------------------------------------------------------------------------------------------------------------------------------------------------------------------------------------------------|--------------------------------------------------|
|    |                |      | depression within a randomized controlled trial                                                                                                                                                                                             |                                                  |
| 64 | Kenicer, D     | 2012 | A national survey of health service infrastructure and policy impacts on access to computerised CBT in Scotland                                                                                                                             | BMC Medical Informatics and Decision Making      |
| 65 | Kenter, R      | 2013 | Guided online treatment in routine mental health care: an observational study on uptake, drop-out and effects                                                                                                                               | BMC Psychiatry                                   |
| 66 | Kerr, J        | 2008 | A pilot study to assess the feasibility and acceptability of a community based physical activity intervention (involving Internet, telephone, and pedometer support), integrated with medication and mood management for depressed patients | Mental Health and Physical Activity              |
| 67 | Kessler, D     | 2009 | Therapist-delivered internet psychotherapy for depression in primary care: a randomised controlled trial                                                                                                                                    | Lancet                                           |
| 68 | Kojima, R      | 2010 | Efficacy of Cognitive Behavioral Therapy Training Using Brief E-mail Sessions in the Workplace: A Controlled Clinical Trial                                                                                                                 | Industrial Health                                |
| 69 | Krusche, A     | 2013 | Mindfulness online: an evaluation of the feasibility of a web-based mindfulness course for stress, anxiety and depression                                                                                                                   | BMJ Open                                         |
| 70 | Kurki, M       | 2011 | Usefulness of Internet in adolescent mental health outpatient care                                                                                                                                                                          | Journal of Psychiatric and Mental Health Nursing |
| 71 | Kurki, M       | 2013 | Integration of computer and Internet-based programmes into psychiatric out-patient care of adolescents with depression                                                                                                                      | Informatics for Health & Social Care             |
| 72 | Landback, J    | 2009 | From prototype to product: development of a primary care/Internet based depression prevention intervention for adolescents (CATCH-IT)                                                                                                       | Community Mental Health Journal                  |
| 73 | Lemma, A       | 2013 | Feasibility study of a psychodynamic online group intervention for depression                                                                                                                                                               | Psychoanalytic Psychology                        |
| 74 | Levin, M E     | 2014 | Feasibility of a Prototype Web-Based Acceptance and Commitment Therapy Prevention Program for College Students                                                                                                                              | Journal of American College Health               |
| 75 | Lillevoll, K R | 2013 | Patients' experiences of helpfulness in guided internet-based treatment for depression: qualitative study of integrated therapeutic dimensions                                                                                              | Journal of Medical Internet Research             |
| 76 | Lillevoll, K R | 2014 | Uptake and adherence of a self-directed internet-based mental health intervention with tailored e-mail reminders in senior high schools in Norway                                                                                           | BMC Psychiatry                                   |
| 77 | Lintvedt, O K  | 2008 | The need for web-based cognitive behavior therapy among university students                                                                                                                                                                 | Journal of Technology in Human Services          |
| 78 | Lintvedt, O K  | 2013 | Evaluating the effectiveness and efficacy of unguided internet-based self-help intervention for the prevention of depression: a randomized controlled trial                                                                                 | Clinical Psychology & Psychotherapy              |

|    |               |      |                                                                                                                                                                |                                            |
|----|---------------|------|----------------------------------------------------------------------------------------------------------------------------------------------------------------|--------------------------------------------|
| 79 | Lintvedt, O K | 2013 | Evaluating the translation process of an Internet-based self-help intervention for prevention of depression: a cost-effectiveness analysis                     | Journal of Medical Internet Research       |
| 80 | Lokkerbol, J  | 2014 | Improving the cost-effectiveness of a healthcare system for depressive disorders by implementing telemedicine: a health economic modeling study                | American Journal of Geriatric Psychiatry   |
| 81 | Mailey, E L   | 2010 | Internet-delivered physical activity intervention for college students with mental health disorders: a randomized pilot trial                                  | Psychology, Health & Medicine              |
| 82 | Mallen, M J   | 2011 | Online counselling: An initial examination of the process in a synchronous chat environment                                                                    | Counselling & Psychotherapy Research       |
| 83 | Maloni, J A   | 2013 | Web Recruitment and Internet Use and Preferences Reported by Women With Postpartum Depression After Pregnancy Complications                                    | Archives of Psychiatric Nursing            |
| 84 | Mansson, K N  | 2013 | Development and initial evaluation of an internet-based support system for face-to-face cognitive behavior therapy: a proof of concept study                   | Journal of Medical Internet Research       |
| 85 | Marko, M.     | 2010 | Adolescent Internet depression prevention: Preferences for intervention and predictors of intentions and adherence                                             | Journal of CyberTherapy and Rehabilitation |
| 86 | Mewton, L     | 2013 | A naturalistic study of the acceptability and effectiveness of internet-delivered cognitive behavioural therapy for psychiatric disorders in older australians | PLoS ONE                                   |
| 87 | Meyer, B      | 2009 | Effectiveness of a novel integrative online treatment for depression (Deprexis): randomized controlled trial                                                   | Journal of Medical Internet Research       |
| 88 | Meyer, D      | 2007 | Online self-help: developing a student-focused website for depression...<br>www.studentdepression.org                                                          | Counselling & Psychotherapy Research       |
| 89 | Mohr, D C     | 2010 | Interest in behavioral and psychological treatments delivered face-to-face, by telephone, and by internet                                                      | Annals of Behavioral Medicine              |
| 90 | Mohr, D C     | 2010 | Multimodal e-mental health treatment for depression: a feasibility trial                                                                                       | Journal of Medical Internet Research       |
| 91 | Mongrain, M   | 2012 | Do Positive Psychology Exercises Work? A Replication of Seligman et al. ()                                                                                     | Journal of Clinical Psychology             |
| 92 | Mora, L       | 2008 | Psychologist treatment recommendations for Internet-based therapeutic interventions                                                                            | Computers in Human Behavior                |
| 93 | Morgan, A J   | 2012 | Email-based promotion of self-help for subthreshold depression: Mood Memos randomised controlled trial                                                         | British Journal of Psychiatry              |
| 94 | Morgan, A J   | 2013 | Behavior change through automated e-mails: Mediation analysis of self-help strategy use for depressive symptoms                                                | Behaviour Research and Therapy             |
| 95 | Morgan, A J   | 2013 | Internet-based recruitment to a depression prevention intervention: lessons from the Mood Memos study                                                          | Journal of Medical Internet Research       |

|     |                 |      |                                                                                                                                                                                |                                                |
|-----|-----------------|------|--------------------------------------------------------------------------------------------------------------------------------------------------------------------------------|------------------------------------------------|
| 96  | Morgan, A J     | 2013 | Self-help for depression via e-mail: A randomised controlled trial of effects on depression and self-help behaviour                                                            | PLoS ONE                                       |
| 97  | Moritz, S       | 2012 | A randomized controlled trial of internet-based therapy in depression                                                                                                          | Behaviour Research and Therapy                 |
| 98  | Moritz, S       | 2013 | The more it is needed, the less it is wanted: attitudes toward face-to-face intervention among depressed patients undergoing online treatment                                  | Depression and Anxiety                         |
| 99  | Mota Pereira, J | 2014 | Facebook Enhances Antidepressant Pharmacotherapy Effects                                                                                                                       | Scientific World Journal                       |
| 100 | Naversnik, K    | 2013 | Cost-effectiveness of a novel e-health depression service                                                                                                                      | Telemedicine Journal and e-Health              |
| 101 | Neil, A L       | 2009 | Predictors of adherence by adolescents to a cognitive behavior therapy website in school and community-based settings                                                          | Journal of Medical Internet Research           |
| 102 | Newby, J M      | 2013 | Internet cognitive behavioural therapy for mixed anxiety and depression: a randomized controlled trial and evidence of effectiveness in primary care                           | Psychological Medicine                         |
| 103 | Nordgreen, T    | 2011 | Use of self-help materials for anxiety and depression in mental health services: A national survey of psychologists in Norway                                                  | Professional Psychology: Research and Practice |
| 104 | O'Kearney, R    | 2006 | Effects of a cognitive-behavioural internet program on depression, vulnerability to depression and stigma in adolescent males: a school-based controlled trial                 | Cognitive Behaviour Therapy                    |
| 105 | O'Kearney, R    | 2009 | A controlled trial of a school-based Internet program for reducing depressive symptoms in adolescent girls                                                                     | Depression and Anxiety                         |
| 106 | O'Mahen, H A    | 2013 | Internet-based behavioral activation-Treatment for postnatal depression (Netmums): A randomized controlled trial                                                               | Journal of Affective Disorders                 |
| 107 | O'Mahen, H A    | 2013 | Netmums: a phase II randomized controlled trial of a guided Internet behavioural activation treatment for postpartum depression                                                | Psychological Medicine                         |
| 108 | Patten, S B     | 2003 | Prevention of depressive symptoms through the use of distance technologies                                                                                                     | Psychiatric Services                           |
| 109 | Phillips, R     | 2014 | Randomized controlled trial of computerized cognitive behavioural therapy for depressive symptoms: effectiveness and costs of a workplace intervention                         | Psychological Medicine                         |
| 110 | Pittaway, S     | 2009 | Comparative, clinical feasibility study of three tools for delivery of cognitive behavioural therapy for mild to moderate depression and anxiety provided on a self-help basis | Mental Health in Family Medicine               |
| 111 | Proudfoot, J    | 2013 | Impact of a mobile phone and web program on symptom and functional outcomes for people with mild-to-moderate depression, anxiety and stress: a randomised controlled trial     | BMC Psychiatry                                 |
| 112 | Pugh, N E       | 2014 | A Case Study Illustrating Therapist-Assisted Internet Cognitive Behavior Therapy for Depression                                                                                | Cognitive and Behavioral Practice              |

|     |                |      |                                                                                                                                                                        |                                                                  |
|-----|----------------|------|------------------------------------------------------------------------------------------------------------------------------------------------------------------------|------------------------------------------------------------------|
| 113 | Reynolds, D J  | 2013 | Impact of Exchanges and Client-Therapist Alliance in Online-Text Psychotherapy                                                                                         | Cyberpsychology Behavior and Social Networking                   |
| 114 | Richards, D    | 2009 | The experience of implementing, recruiting and screening for an online treatment for depression in a naturalistic setting                                              | Counselling Psychology Review                                    |
| 115 | Richards, D    | 2012 | Client-identified helpful and hindering events in therapist-delivered vs. self-administered online cognitive-behavioural treatments for depression in college students | Counselling Psychology Quarterly                                 |
| 116 | Richards, D    | 2013 | A comparison of two online cognitive-behavioural interventions for symptoms of depression in a student population: The role of therapist responsiveness                | Counselling & Psychotherapy Research                             |
| 117 | Richards, D    | 2013 | Satisfaction with therapist-delivered vs. self-administered online cognitive behavioural treatments for depression symptoms in college students                        | British Journal of Guidance & Counselling                        |
| 118 | Robertson, L   | 2005 | Case management and adherence to an online disease management system                                                                                                   | Journal of Telemedicine and Telecare                             |
| 119 | Robertson, L   | 2006 | Using the Internet to enhance the treatment of depression                                                                                                              | Australasian Psychiatry                                          |
| 120 | Rogers, V L    | 2009 | Internet versus face-to-face therapy: emotional self-disclosure issues for young adults                                                                                | Issues in Mental Health Nursing                                  |
| 121 | Ruby, A.       | 2013 | Economic Analysis of an Accountable Care Organization Centered Internet-Based Depression Prevention                                                                    | The Journal of Mental Health Policy and Economics                |
| 122 | Ruwaard, J     | 2009 | Standardized web-based cognitive behavioural therapy of mild to moderate depression: a randomized controlled trial with a long-term follow-up                          | Cognitive Behaviour Therapy                                      |
| 123 | Ruwaard, J     | 2012 | The effectiveness of online cognitive behavioral treatment in routine clinical practice                                                                                | PLoS ONE                                                         |
| 124 | Saulsberry, A  | 2013 | Randomized Clinical Trial of a Primary Care Internet-based Intervention to Prevent Adolescent Depression: One-year Outcomes                                            | Journal of the Canadian Academy of Child & Adolescent Psychiatry |
| 125 | Schneider, J   | 2014 | Acceptability of online self-help to people with depression: users' views of MoodGYM versus informational websites.                                                    | Journal of Medical Internet Research                             |
| 126 | Schueller, S M | 2012 | Disseminating self-help: positive psychology exercises in an online trial                                                                                              | Journal of Medical Internet Research                             |
| 127 | Seligman, M E  | 2007 | Group prevention of depression and anxiety symptoms                                                                                                                    | Behaviour Research and Therapy                                   |
| 128 | Sergeant, S    | 2014 | An Online Optimism Intervention Reduces Depression in Pessimistic Individuals                                                                                          | Journal of Consulting and Clinical Psychology Jan                |
| 129 | Shapira, L B   | 2010 | The benefits of self-compassion and optimism exercises for individuals vulnerable to depression                                                                        | The Journal of Positive Psychology                               |
| 130 | Sharry, J      | 2013 | A service-based evaluation of a therapist-supported online cognitive behavioral therapy program for depression                                                         | Journal of Medical Internet Research                             |



|     |                        |      |                                                                                                                                                                                      |                                                         |
|-----|------------------------|------|--------------------------------------------------------------------------------------------------------------------------------------------------------------------------------------|---------------------------------------------------------|
| 131 | Sheeber, L B           | 2012 | Development and pilot evaluation of an Internet-facilitated cognitive-behavioral intervention for maternal depression                                                                | Journal of Consulting and Clinical Psychology           |
| 132 | Silberman, J           | 2011 | Reductions in Employee Productivity Impairment Observed After Implementation of Web-Based Worksite Health Promotion Programs                                                         | Journal of Occupational and Environmental Medicine      |
| 133 | Simon, G E             | 2011 | Randomized trial of depression follow-up care by online messaging                                                                                                                    | Journal of General Internal Medicine                    |
| 134 | Sobowale, K            | 2013 | Adaptation of an internet-based depression prevention intervention for Chinese adolescents: From "CATCH-IT" to "grasp the opportunity"                                               | International Journal of Adolescent Medicine and Health |
| 135 | Spek, V                | 2008 | One-year follow-up results of a randomized controlled clinical trial on internet-based cognitive behavioural therapy for subthreshold depression in people over 50 years             | Psychological Medicine                                  |
| 136 | Spek, V                | 2008 | Predictors of outcome of group and internet-based cognitive behavior therapy                                                                                                         | Journal of Affective Disorders                          |
| 137 | Sunderland, M          | 2012 | Investigating trajectories of change in psychological distress amongst patients with depression and generalised anxiety disorder treated with internet cognitive behavioural therapy | Behaviour Research and Therapy                          |
| 138 | Titov, N               | 2010 | Characteristics of adults with anxiety or depression treated at an internet clinic: comparison with a national survey and an outpatient clinic                                       | PLoS ONE                                                |
| 139 | Titov, N               | 2010 | Internet treatment for depression: a randomized controlled trial comparing clinician vs. technician assistance                                                                       | PLoS ONE                                                |
| 140 | Titov, N               | 2013 | Improving adherence and clinical outcomes in self-guided internet treatment for anxiety and depression: randomised controlled trial                                                  | PLoS ONE                                                |
| 141 | Titov, N               | 2014 | Improving adherence and clinical outcomes in self-guided internet treatment for anxiety and depression: a 12-month follow-up of a randomised controlled trial                        | PLoS ONE                                                |
| 142 | Unlu Ince, B           | 2013 | Internet-based, culturally sensitive, problem-solving therapy for Turkish migrants with depression: randomized controlled trial                                                      | Journal of Medical Internet Research                    |
| 143 | Valimaki, M            | 2012 | Developing an internet-based support system for adolescents with depression                                                                                                          | JMIR Research Protocols                                 |
| 144 | van der Zanden, R      | 2012 | Effectiveness of an online group course for depression in adolescents and young adults: a randomized trial                                                                           | Journal of Medical Internet Research                    |
| 145 | van der Zanden, R      | 2013 | Online cognitive-based intervention for depression: exploring possible circularity in mechanisms of change                                                                           | Psychological Medicine                                  |
| 146 | Van Gemert-Pijnen, J E | 2014 | Understanding the usage of content in a mental health intervention for depression: an analysis of log data                                                                           | Journal of Medical Internet Research                    |
| 147 | Van Voorhees, B W      | 2005 | Pilot study of a primary care internet-based depression prevention intervention for late adolescents                                                                                 | The Canadian Child & Adolescent Psychiatry Review       |

|     |                   |      |                                                                                                                                                                                         |                                                                  |
|-----|-------------------|------|-----------------------------------------------------------------------------------------------------------------------------------------------------------------------------------------|------------------------------------------------------------------|
| 148 | Van Voorhees, B W | 2007 | Development and process evaluation of a primary care internet-based intervention to prevent depression in emerging adults                                                               | Primary Care Companion to the Journal of Clinical Psychiatry     |
| 149 | Van Voorhees, B W | 2008 | Integrative internet-based depression prevention for adolescents: a randomized clinical trial in primary care for vulnerability and protective factors                                  | Journal of the Canadian Academy of Child & Adolescent Psychiatry |
| 150 | Van Voorhees, B W | 2009 | Adolescent dose and ratings of an Internet-based depression prevention program: A randomized trial of primary care physician brief advice versus a motivational interview               | Journal of Cognitive and Behavioral Psychotherapies              |
| 151 | Van Voorhees, B W | 2009 | Randomized clinical trial of an Internet-based depression prevention program for adolescents (Project CATCH-IT) in primary care: 12-week outcomes                                       | Journal of Developmental and Behavioral Pediatrics               |
| 152 | Van Voorhees, B W | 2010 | Adolescents in primary care with sub-threshold depressed mood screened for participation in a depression prevention study: Co-morbidity and factors associated with depressive symptoms | The Open Psychiatry Journal                                      |
| 153 | Van Voorhees, B W | 2010 | Development and pilot study of a marketing strategy for primary care/internet-based depression prevention intervention for adolescents (the CATCH-IT intervention)                      | Primary Care Companion to the Journal of Clinical Psychiatry     |
| 154 | Vangberg, H C     | 2012 | Does Personality Predict Depression and Use of an Internet-Based Intervention for Depression among Adolescents?                                                                         | Depression Research and Treatment                                |
| 155 | Warmerdam, L      | 2010 | Cost-utility and cost-effectiveness of internet-based treatment for adults with depressive symptoms: randomized trial (Provisional abstract)                                            | Journal of Medical Internet Research                             |
| 156 | Watkins, D C      | 2011 | Email reminders as a self-management tool in depression: a needs assessment to determine patients' interests and preferences                                                            | Journal of Telemedicine and Telecare                             |
| 157 | Watts, S          | 2012 | A clinical audit of changes in suicide ideas with internet treatment for depression                                                                                                     | BMJ Open                                                         |
| 158 | Watts, S          | 2013 | CBT for depression: A pilot RCT comparing mobile phone vs. computer                                                                                                                     | BMC Psychiatry                                                   |
| 159 | Wilhelmsen, M     | 2013 | Motivation to persist with internet-based cognitive behavioural treatment using blended care: a qualitative study                                                                       | BMC Psychiatry                                                   |
| 160 | Williams, A D     | 2013 | Combining imagination and reason in the treatment of depression: a randomized controlled trial of internet-based cognitive-bias modification and internet-CBT for depression            | Journal of Consulting and Clinical Psychology                    |
| 161 | Williams, A D     | 2013 | The effectiveness of Internet cognitive behavioural therapy (iCBT) for depression in primary care: a quality assurance study                                                            | PLoS ONE                                                         |
| 162 | Williams, A D     | 2013 | The impact of psychological distress tolerance in the treatment of depression                                                                                                           | Behaviour Research and Therapy                                   |
| 163 | Wojtowicz, M      | 2013 | Predictors of participant retention in a guided online self-help program for university students: prospective cohort study                                                              | Journal of Medical Internet Research                             |

|     |             |      |                                                                                                                                                      |                              |
|-----|-------------|------|------------------------------------------------------------------------------------------------------------------------------------------------------|------------------------------|
| 164 | Woodford, J | 2011 | Recruitment into a guided internet based CBT (iCBT) intervention for depression: lesson learnt from the failure of a prevalence recruitment strategy | Contemporary Clinical Trials |
|-----|-------------|------|------------------------------------------------------------------------------------------------------------------------------------------------------|------------------------------|

---
